# Supplementary material for: Deep Eutectic Solvent Coated Cerium Oxide Nanoparticles Based Polysulfone Membrane to Mitigate Environmental Toxicology
Source: MDPI journal article supplement (doi:10.3390/molecules28207162), 2023-10-19
Supplement: s1 [file s1]

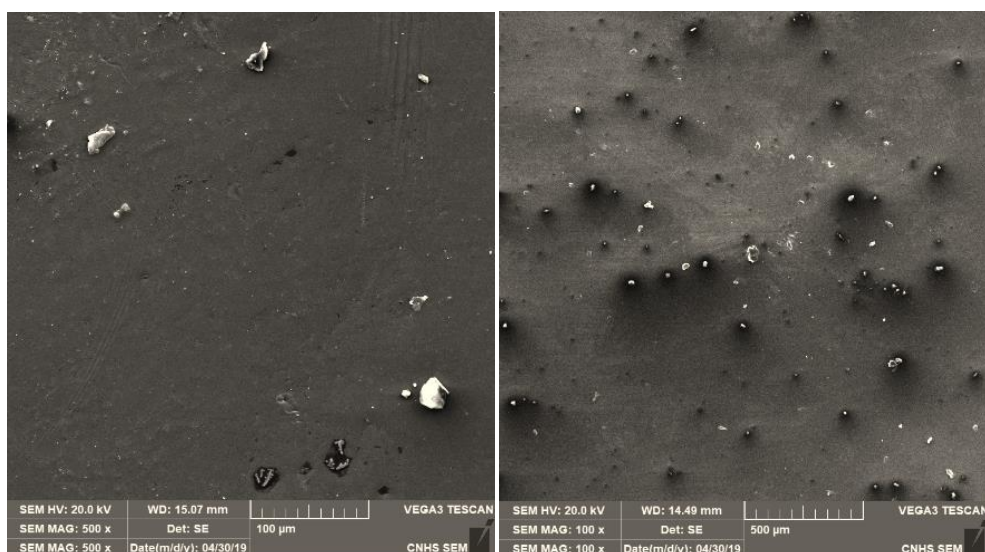

**Figure S1:** Surface images of synthesized membranes

**Table S1:** The pure gas permeability and ideal gas selectivity of DES-ceria NPs based MMMs

| Membrane | Permeability (Barrer) |                 |                | Selectivity                      |                                 |
|----------|-----------------------|-----------------|----------------|----------------------------------|---------------------------------|
|          | CO <sub>2</sub>       | CH <sub>4</sub> | N <sub>2</sub> | CO <sub>2</sub> /CH <sub>4</sub> | CO <sub>2</sub> /N <sub>2</sub> |
| M-0      | 6.7                   | 0.27            | 0.25           | 24.81                            | 26.8                            |
| M-1      | 9.9                   | 0.32            | 0.3            | 30.94                            | 33                              |
| M-2      | 13                    | 0.37            | 0.35           | 35.14                            | 37.14                           |
| M-3      | 14.9                  | 0.39            | 0.38           | 38.21                            | 39.21                           |
| M-4      | 17.2                  | 0.41            | 0.42           | 41.95                            | 40.95                           |

**Table S2:** The mixed gas permeabilities and selectivities of DES-ceria NPs based MMMs

| Membrane | Permeability<br>(Barrer) |                 | Selectivity                      | Permeability<br>(Barrer) |                | Selectivity                     |
|----------|--------------------------|-----------------|----------------------------------|--------------------------|----------------|---------------------------------|
|          | CO <sub>2</sub>          | CH <sub>4</sub> | CO <sub>2</sub> /CH <sub>4</sub> | CO <sub>2</sub>          | N <sub>2</sub> | CO <sub>2</sub> /N <sub>2</sub> |
| M-0      | 6.06                     | 0.26            | 23.31                            | 6.36                     | 0.25           | 25.44                           |
| M-1      | 9.2                      | 0.31            | 29.68                            | 9.5                      | 0.31           | 30.65                           |
| M-2      | 12.7                     | 0.39            | 32.56                            | 12.8                     | 0.36           | 35.56                           |
| M-3      | 14.5                     | 0.43            | 33.72                            | 14.7                     | 0.4            | 36.75                           |
| M-4      | 16.3                     | 0.46            | 35.43                            | 16.9                     | 0.43           | 39.3                            |
